# Supplementary material for: Extremely Low-Frequency Electromagnetic Stimulation (ELF-EMS) Improves Neurological Outcome and Reduces Microglial Reactivity in a Rodent Model of Global Transient Stroke
Source: MDPI journal article supplement (doi:10.3390/ijms241311117), 2023-07-05
Supplement: s1 [file s1]

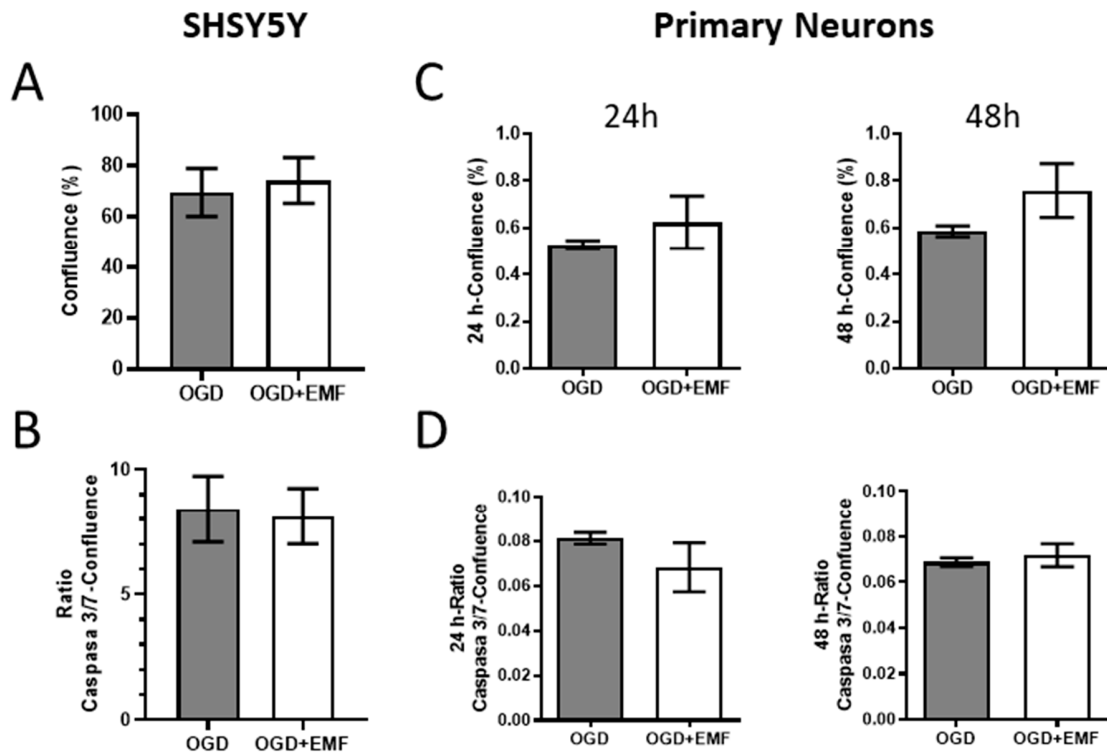

**Supplementary Figure S1 ELF-EMS does not affect survival on neuron monocultures.** SH-SY5Y and primary neuron cells were submitted to 2 h OGD (1% O<sub>2</sub> and 5% CO<sub>2</sub>, 30 min after the treated group was stimulated with 13.5 mT/ 60 Hz ELF-EMS for 20 min. Confluence and caspase 3/7 were measured 24 h and 48 h after OGD (**A**) Confluence of SH-SY5Y cell cultures 24 h after OGD (**B**). The ratio between % Caspase 3/7 and %Confluence 24 h after OGD in SH-SY5Y cells. (**C**) The confluence of primary neurons cultures 24 h (left) and 48 h (right) after OGD (**D**). The ratio between % Caspase 3/7 and %Confluence 24 h (left) and 48 h (right) after OGD in primary neurons. Statistical analysis was made with the t-student test for unpaired samples (n=4/each experiment).
